# Supplementary material for: Characterizing the Groundwater Flow Regime in a Landslide Recharge Area Using Stable Isotopes: A Case Study of the Urbas Landslide Area in NW Slovenia
Source: MDPI journal article supplement (doi:10.3390/w14060912), 2022-03-15
Supplement: s1 [file s1]

Archive with 1 entries (1 files):
- water-1589825-supplementary.pdf
