# Supplementary material for: Characterizing the Groundwater Flow Regime in a Landslide Recharge Area Using Stable Isotopes: A Case Study of the Urbas Landslide Area in NW Slovenia
Source: MDPI journal article supplement (doi:10.3390/w14060912), 2022-03-15
Supplement: s1 [file s1 › water-1589825-supplementary.pdf]

# Characterizing the Groundwater Flow Regime in a Landslide Recharge Area Using Stable Isotopes: A Case Study of the Urbas Landslide Area in NW Slovenia

**Table S1.** Isotopic composition of precipitation and amount-weighted monthly mean values of  $\delta^{18}\text{O}$  and  $\delta^2\text{H}$  in precipitation (Rain gauge Urbas).

| Sampling time     | $\delta^{18}\text{O}$ [‰] | $\delta^2\text{H}$ [‰] | $\delta^{18}\text{O}^*$ [‰] | $\delta^2\text{H}^*$ [‰] |
|-------------------|---------------------------|------------------------|-----------------------------|--------------------------|
| 2 July 2018       | −8.87                     | −61.10                 |                             |                          |
| 7 August 2018     | −6.59                     | −39.77                 |                             |                          |
| 3 September 2018  | −9.75                     | −63.37                 |                             |                          |
| 1 October 2018    | −7.30                     | −43.55                 |                             |                          |
| 9 November 2018   | −8.58                     | −51.20                 |                             |                          |
| 5 July 2019       | −11.23                    | −80.28                 |                             |                          |
| 1 August 2019     | −7.23                     | −49.09                 |                             |                          |
| 19 September 2019 | −6.38                     | −41.59                 |                             |                          |
| 9 October 2019    | −10.16                    | −76.12                 | −9.19                       | −67.76                   |
| 11 October 2019   | −7.02                     | −45.54                 |                             |                          |
| 25 October 2019   | −2.84                     | −16.68                 |                             |                          |
| 7 November 2019   | −9.93                     | −76.76                 |                             |                          |
| 5 December 2019   | −7.83                     | −73.60                 |                             |                          |
| 13 May 2020       | −10.59                    | −73.68                 |                             |                          |
| 9 June 2020       | −9.44                     | −64.44                 |                             |                          |
| 11 June 2020      | −9.73                     | −65.57                 | −9.45                       | −64.46                   |
| 7 July 2020       | −7.99                     | −52.12                 | −7.55                       | −48.84                   |
| 15 July 2020      | −6.26                     | −39.13                 |                             |                          |
| 5 August 2020     | −6.56                     | −40.79                 | −6.18                       | −38.40                   |
| 26 August 2020    | −5.81                     | −36.05                 |                             |                          |

\* amount-weighted monthly mean values of  $\delta^{18}\text{O}$  and  $\delta^2\text{H}$  in precipitation (Rain gauge Urbas)
